# Supplementary material
Source: Elsevier journal article supplement (https://comptes-rendus.academie-sciences.fr/biologies/article/10.1016/j.crvi.2013.01.004/file/attach/mmc1.pdf)
Supplement: mmc1 [file mmc1.pdf]

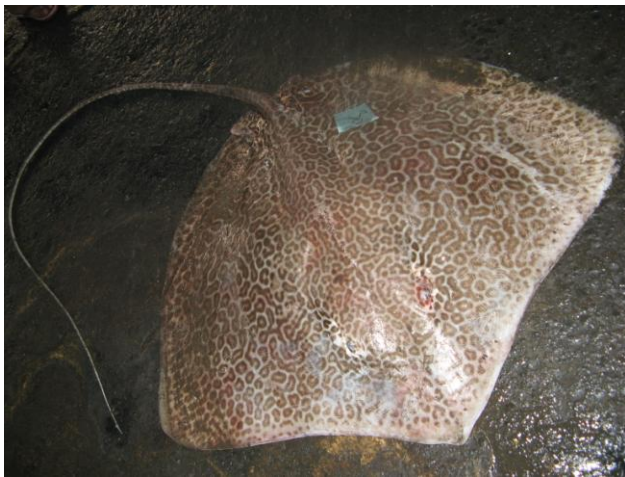

IR 030 (female, 1120 mm DW, cluster 4)

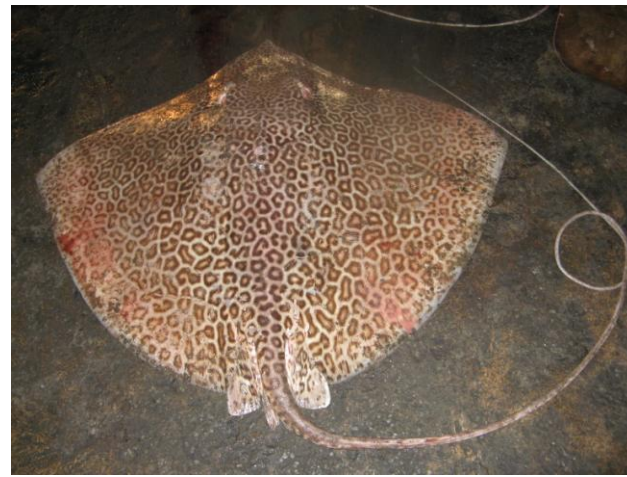

IR 031 (male, 1165 mm DW, cluster 4)

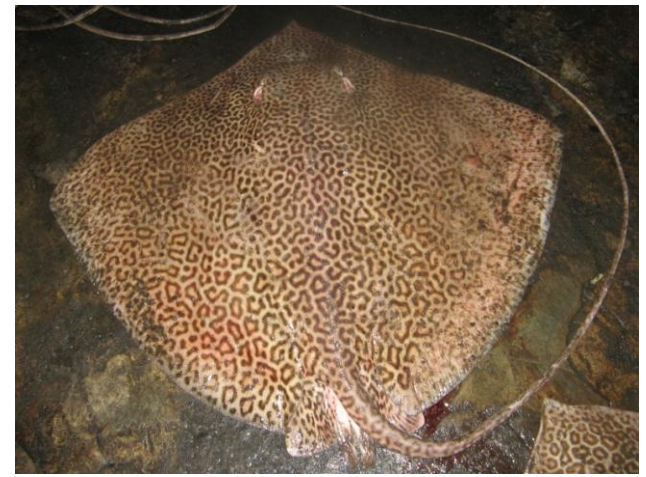

IR 032 (male, 1070 mm DW, cluster 4)

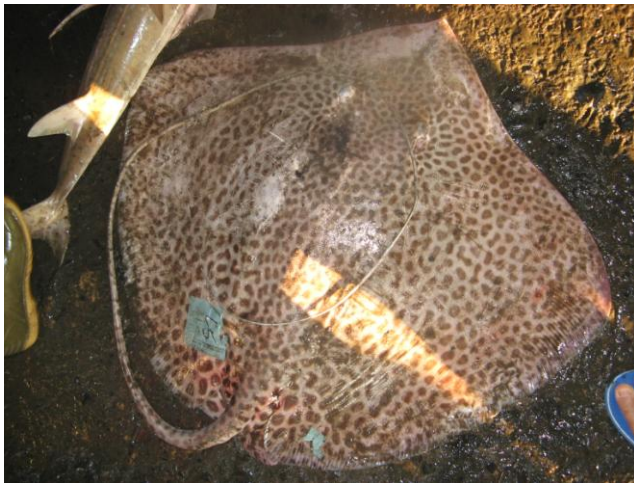

IR 033 (female, 880 mm DW, cluster 4)

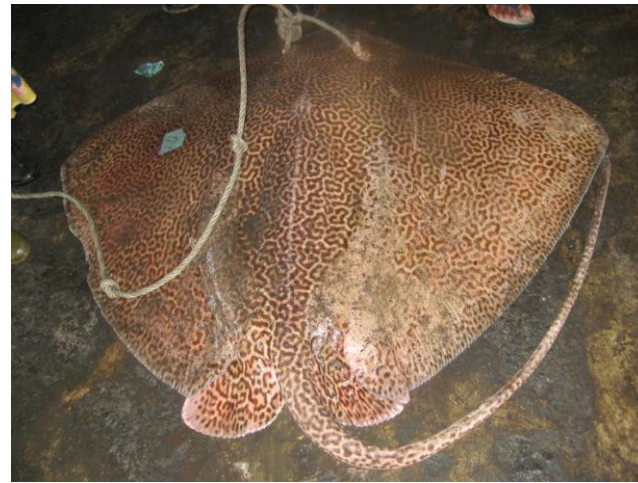

IR 034 (female, 1525 mm DW, cluster 4)

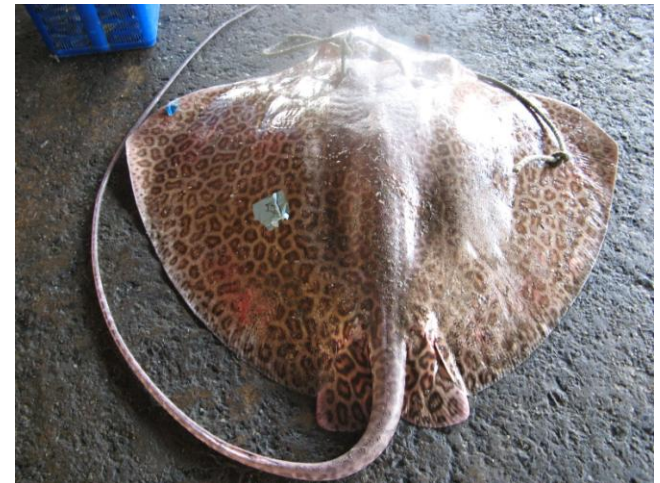

IR 035 (female, 1240 mm DW, cluster 4)

**Fig. S1.** *Himantura uarnak* species complex. Pictures of specimens analyzed in the present study, with details on sex, disk width (DW), and multiple-locus nuclear genotype [Cluster 1, Cluster 3, or Cluster 4 according to Arlyza et al. (2012)]. Sampling locations (fish landing sites) and dates were: Batang, Java Sea, August 2007 (IR 030 – IR 042; IR 044-IR 049); Batang, November 2007 (IR 050 – IR 062); Batang, January 2008 (IR 063 – IR 085); Selayar, Banda Sea, November 2009 (IR 102); Singaraja, Bali Sea, 03 February 2010 (IR 112); Pemba Island, Zanzibar, 26 May 2010 (Zanz 6); Taiwan, East China Sea, 2010 (wjc 637); north-west of Weipa, Gulf of Carpentaria, November 1991 (CSIRO H2903.01),

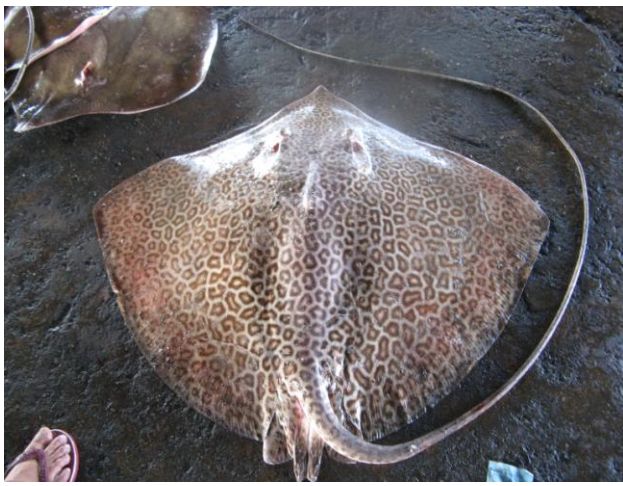

IR 036 (male, 1070 mm DW, cluster 4)

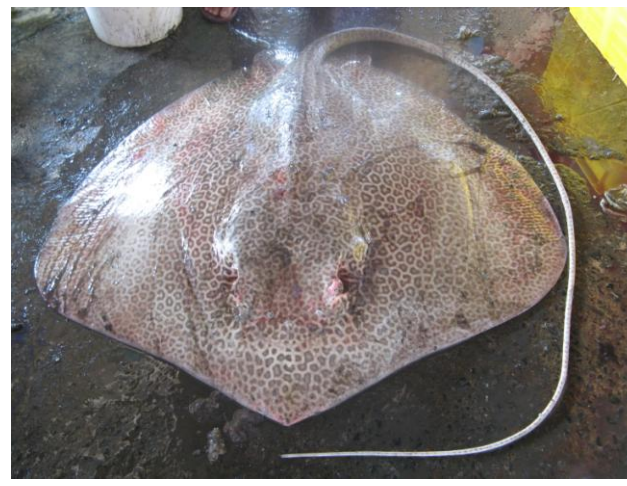

IR 037 (female, 1180 mm DW, presumed F1 cluster 1 x cluster 3)

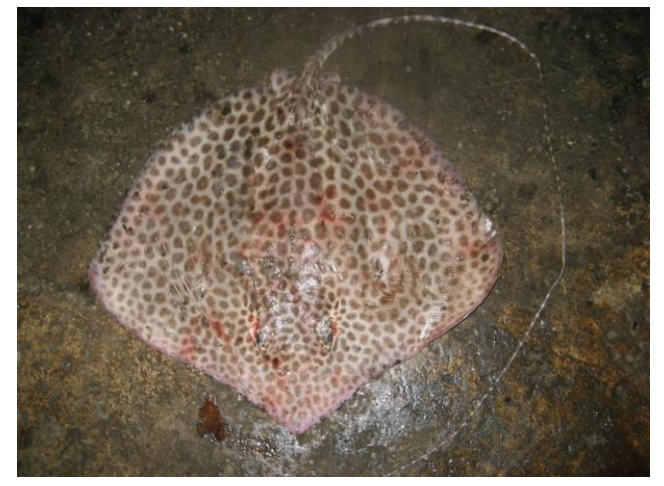

IR 038 (female, 660 mm DW, cluster 4)

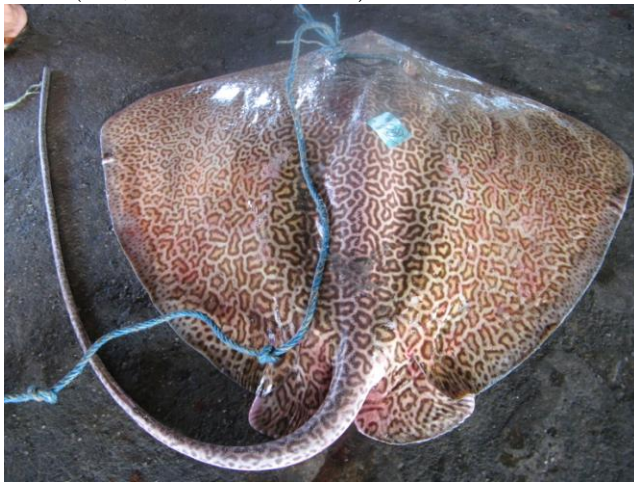

IR 039 (female, 1430 mm DW, cluster 4)

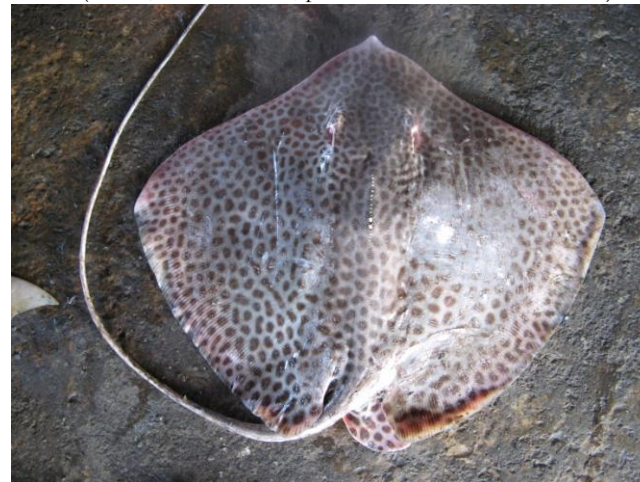

IR 040 (female, 670 mm DW, cluster 4)

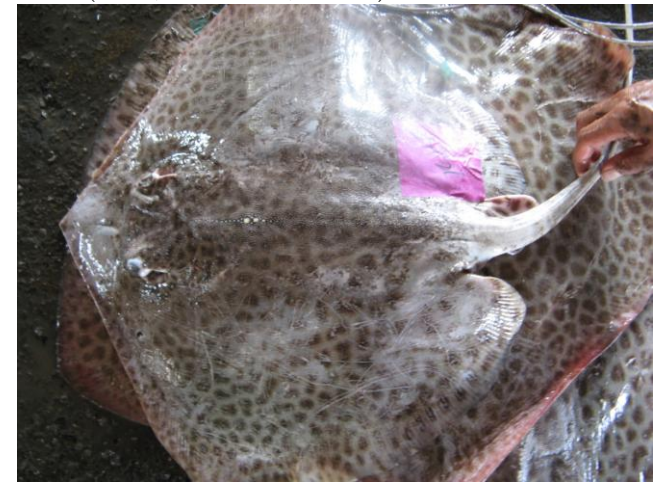

IR 041 (female, 620 mm DW, cluster 4)

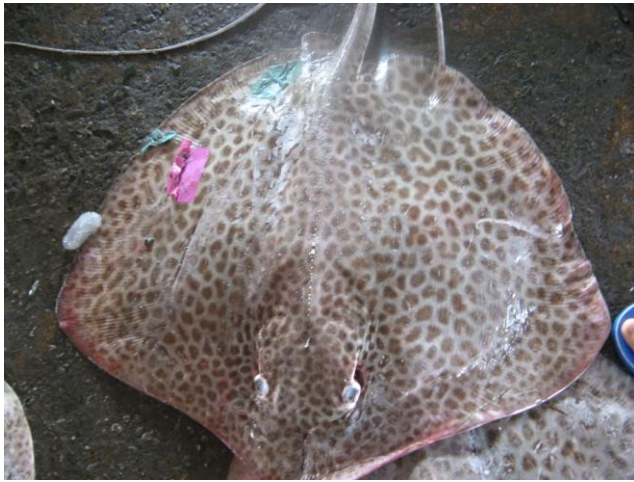

IR 042 (female, 680 mm DW, cluster 4)

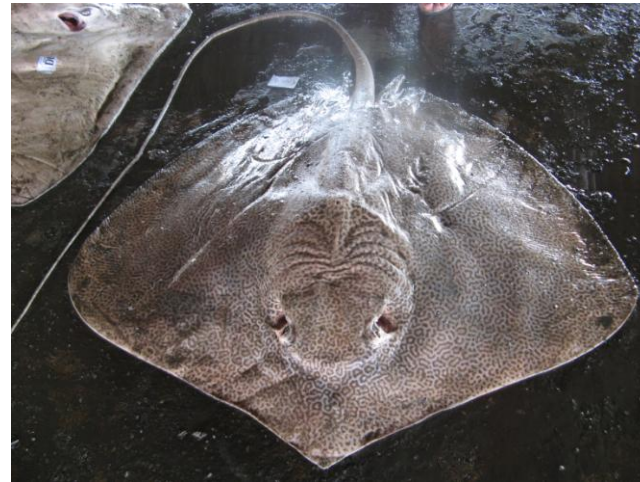

IR 044 (male, 1240 mm DW, cluster 1)

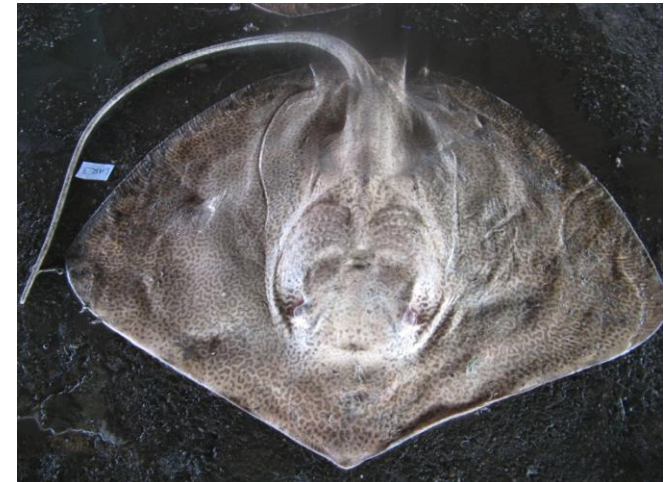

IR 045 (female, 1280 mm DW, cluster 1)

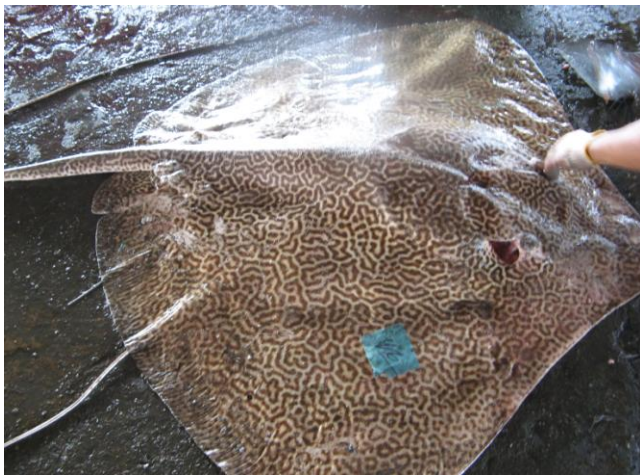

IR46 (female, 1260 mm DW, cluster 4)

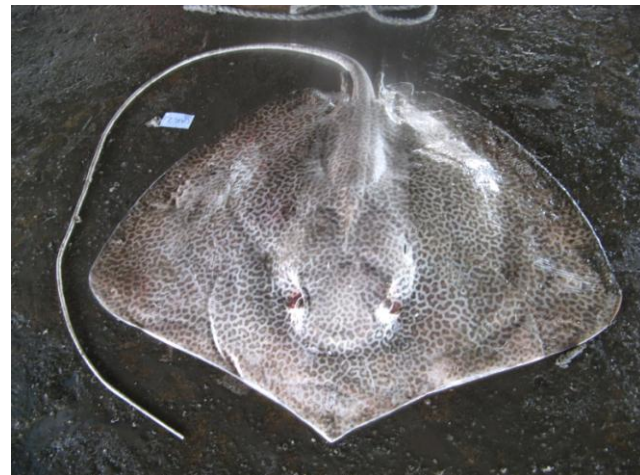

IR 047 (male, 1170 mm DW, cluster 1)

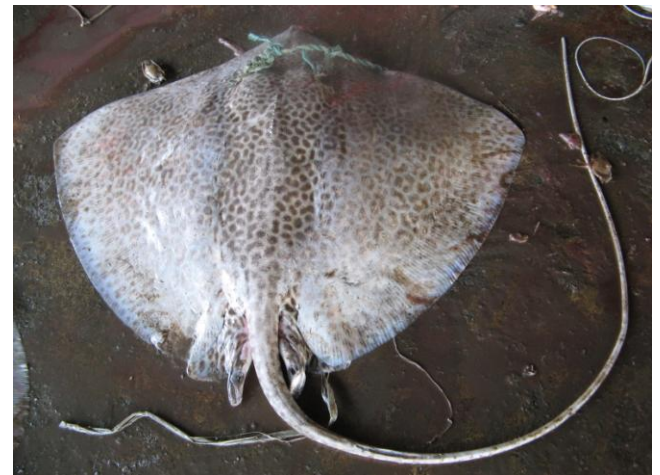

IR 048 (male, 1045 mm DW, cluster 4)

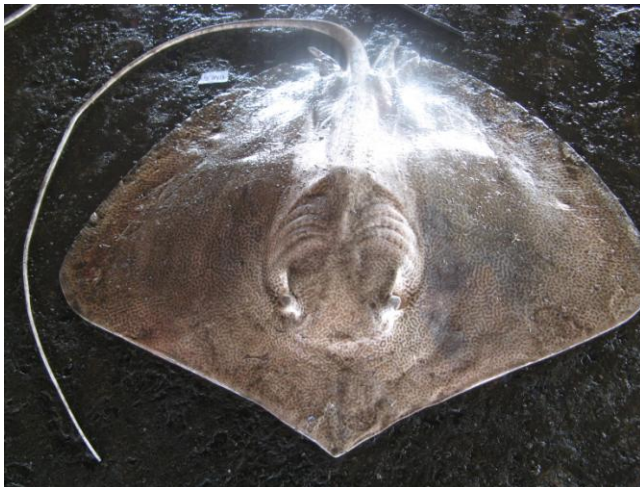

IR 049 (male, 1240 mm DW, cluster 1)

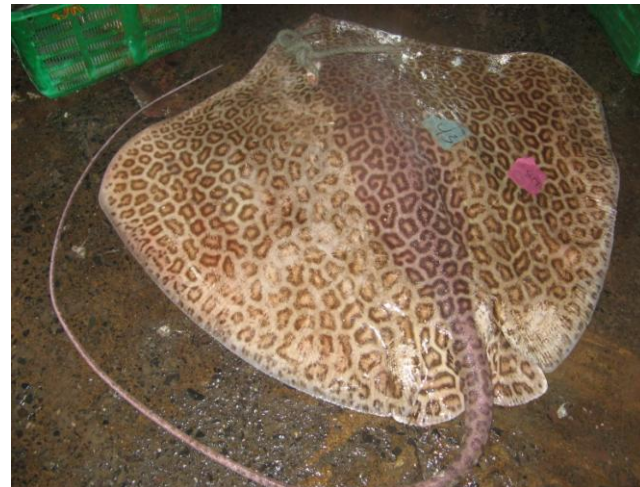

IR 050 (female, 1260 mm DW, cluster 4)

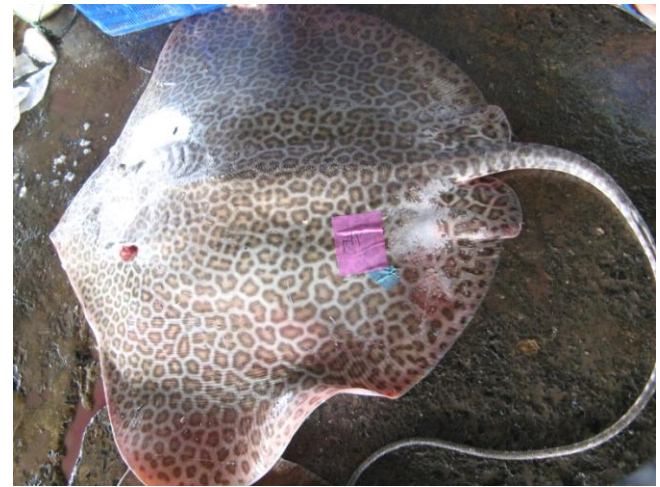

IR 051 (female, 1140 mm DW, cluster 4)

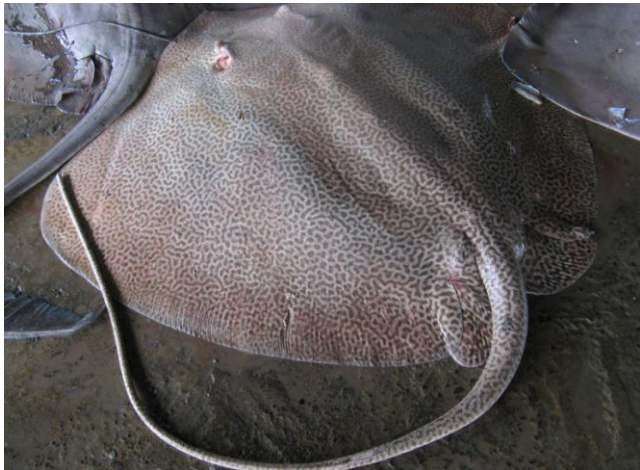

IR 052 (female, 1360 mm DW, cluster 1)

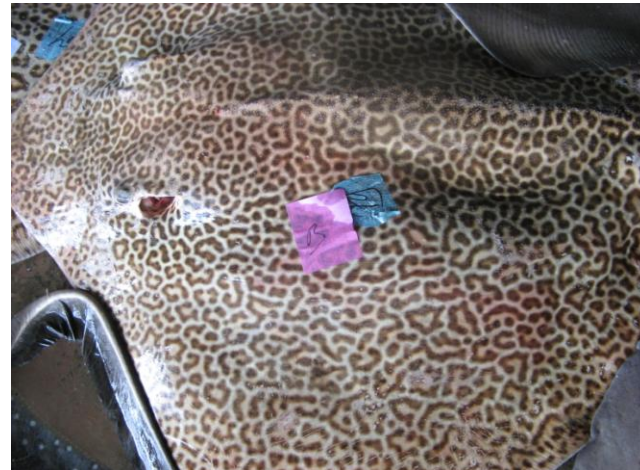

IR 053 (female, 1400 mm DW, cluster 4)

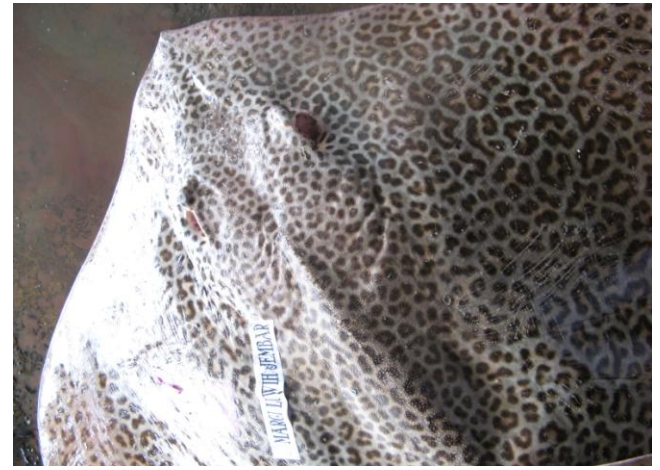

IR 054 (female, 1330 mm DW, cluster 4)

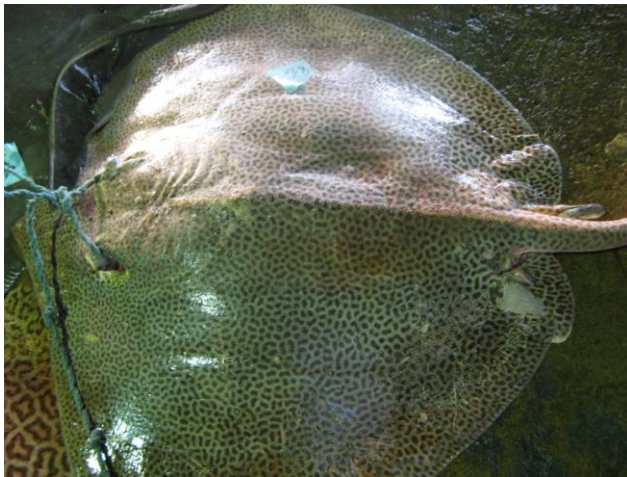

IR 055 (male, 1130 mm DW, cluster 1)

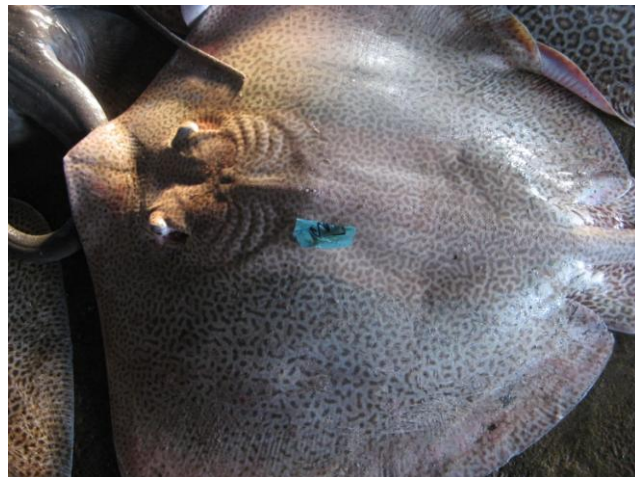

IR 056 (female, 1070 mm DW, cluster 1)

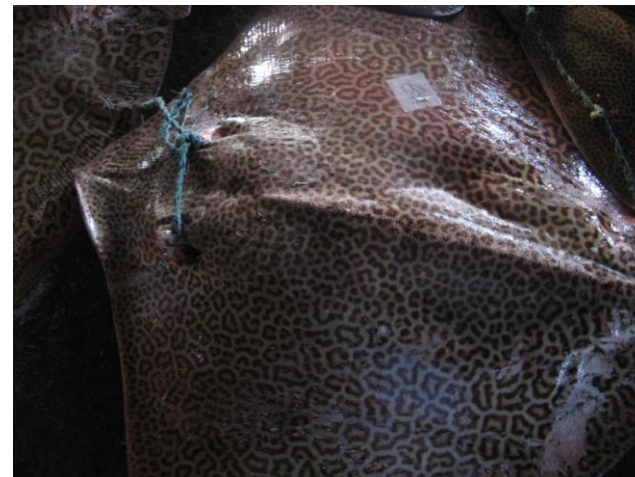

IR 057 (female, 1360 mm DW, cluster 4)

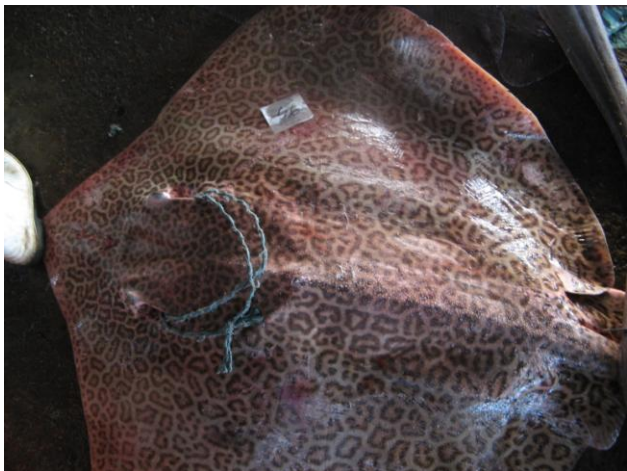

IR 058 (female, 1310 mm DW, cluster 4)

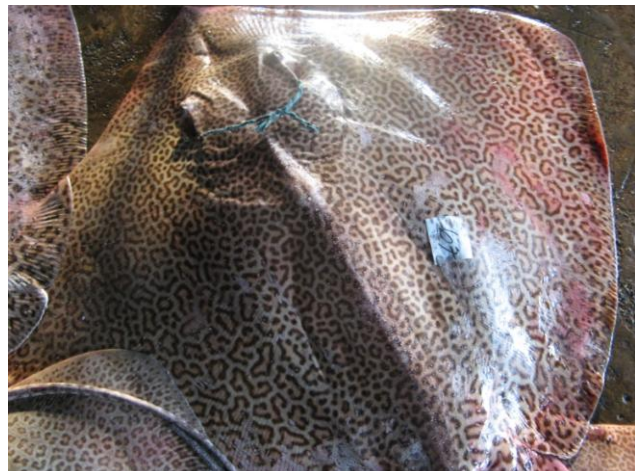

IR 059 (female, 1440 mm DW, cluster 4)

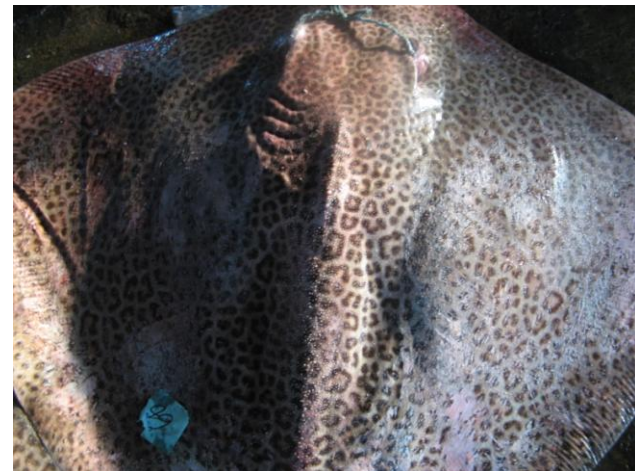

IR 060 (female, 1410 mm DW, cluster 4)

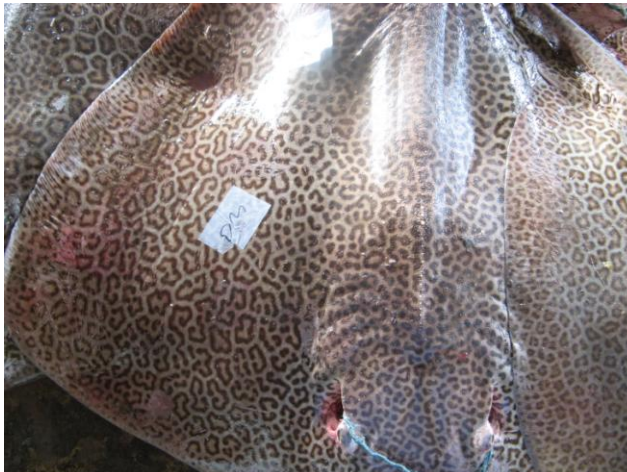

IR 061 (female, 1460 mm DW, cluster 4)

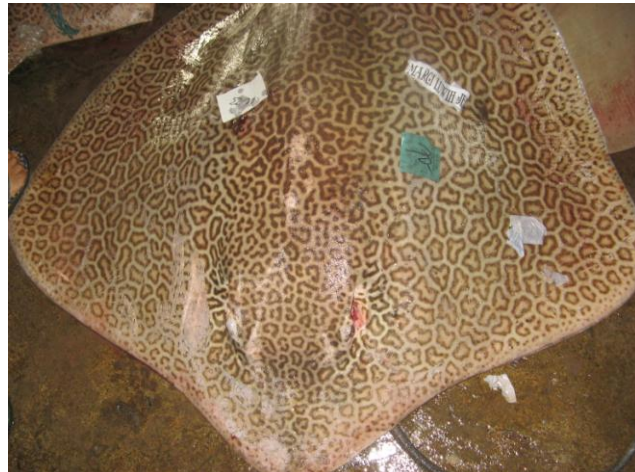

IR 062 (female, 1360 mm DW, cluster 4)

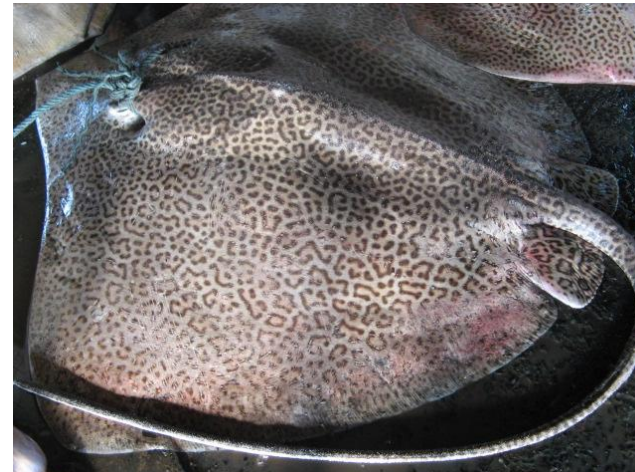

IR 063 (female, 1530 mm DW, cluster 4)

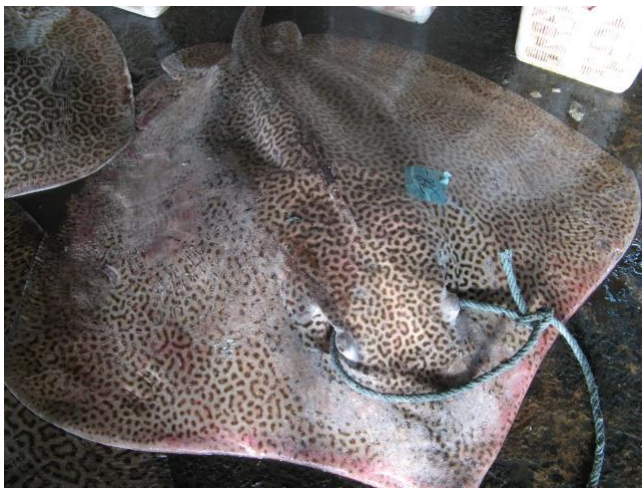

IR 064 (female, 1430 mm DW, cluster 4)

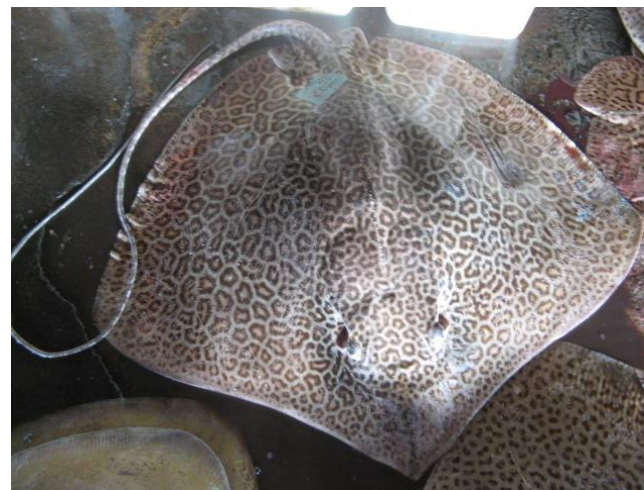

IR 065 (male, 1090 mm DW, cluster 4)

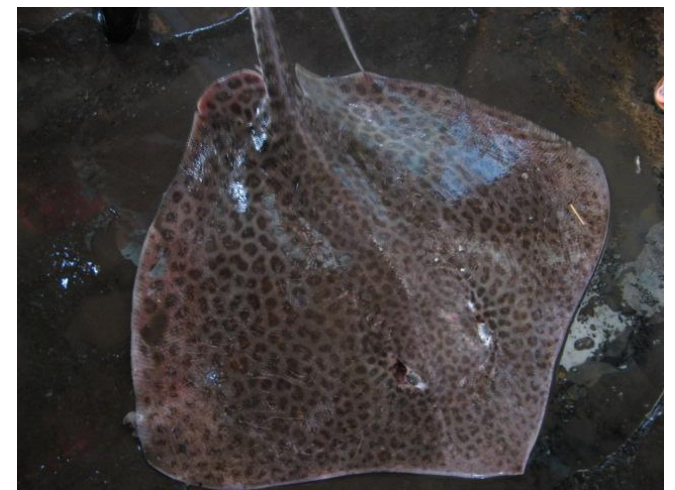

IR 066 (female, 940 mm DW, cluster 4)

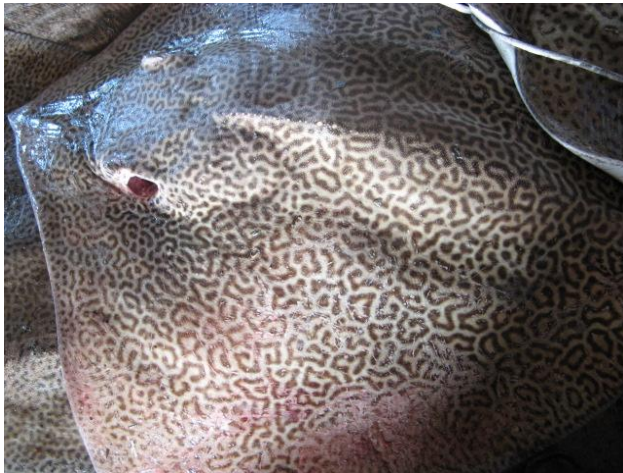

IR 067 (male, 1120 mm DW, cluster 4)

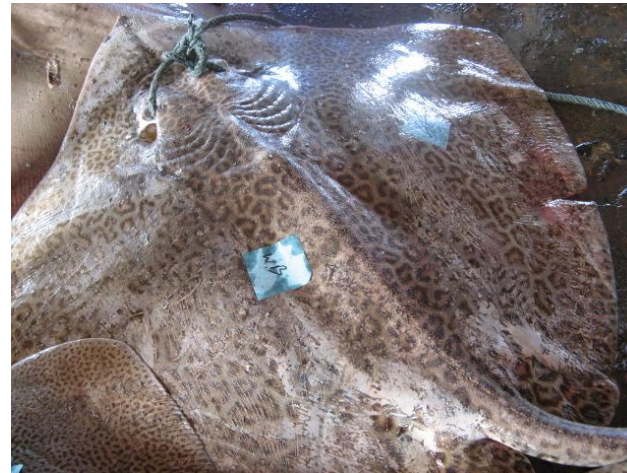

IR 068 (female, 1400 mm DW, cluster 4)

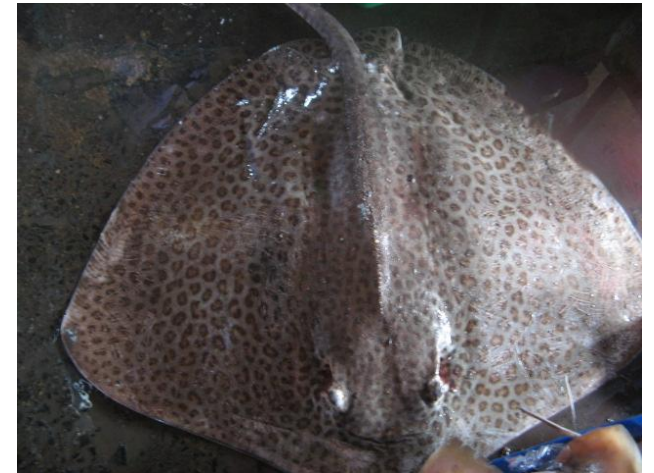

IR 069 (female, 1030 mm DW, cluster 4)

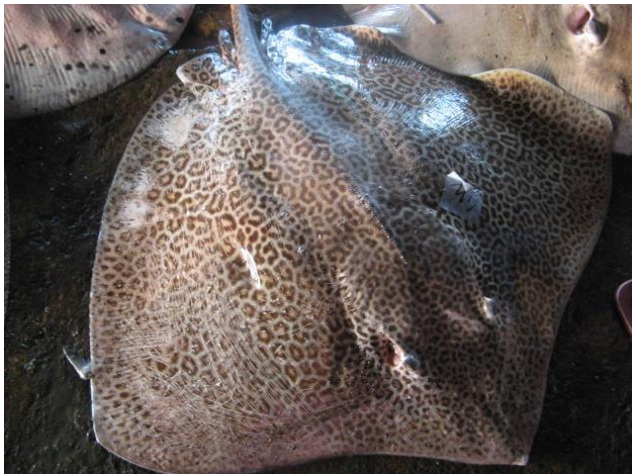

IR 070 (male, 1110 mm DW, cluster 4)

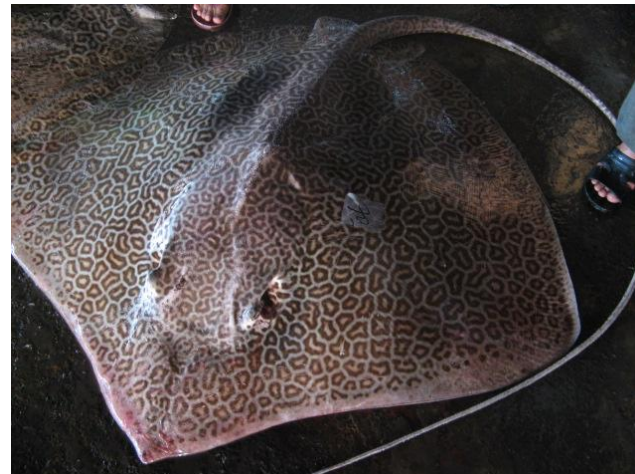

IR 071 (female, 1420 mm DW, cluster 4)

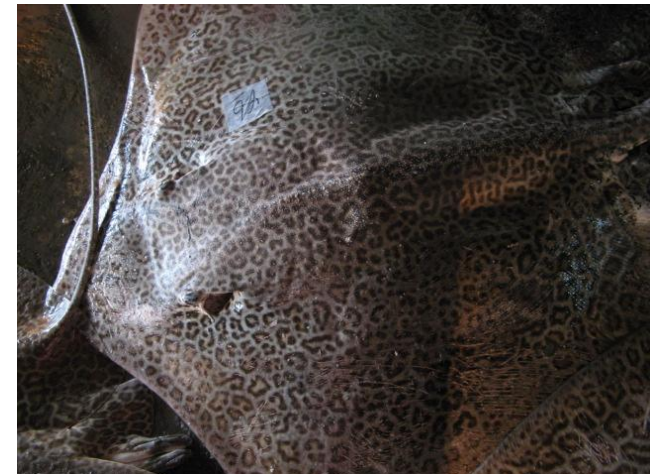

IR 072 (female, 1260 mm DW, cluster 4)

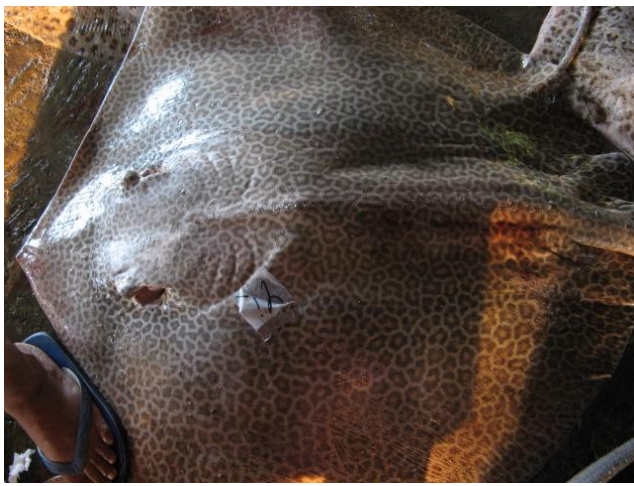

IR 073 (male, 1160 mm DW, cluster 1)

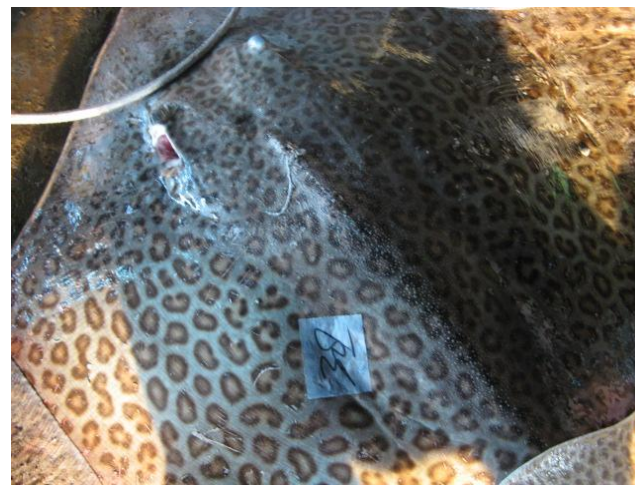

IR 074 (female, 1220 mm DW, cluster 4)

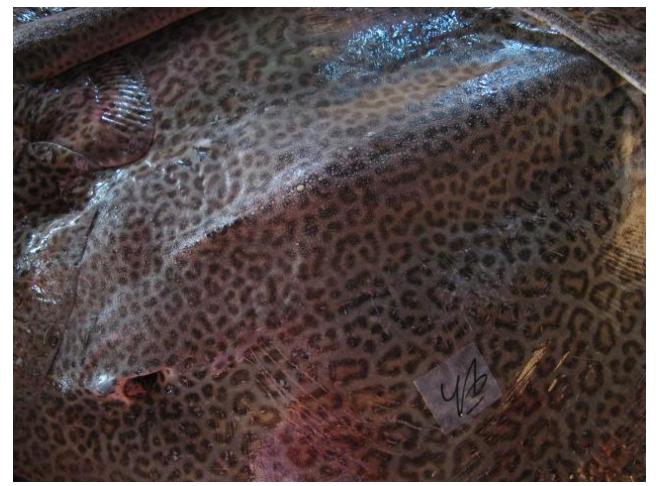

IR 075 (female, 1300 mm DW, cluster 4)

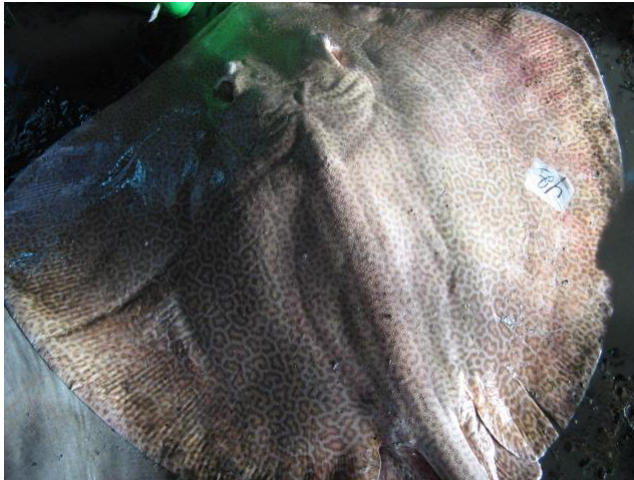

IR 076 (male, 1160 mm DW, cluster 1)

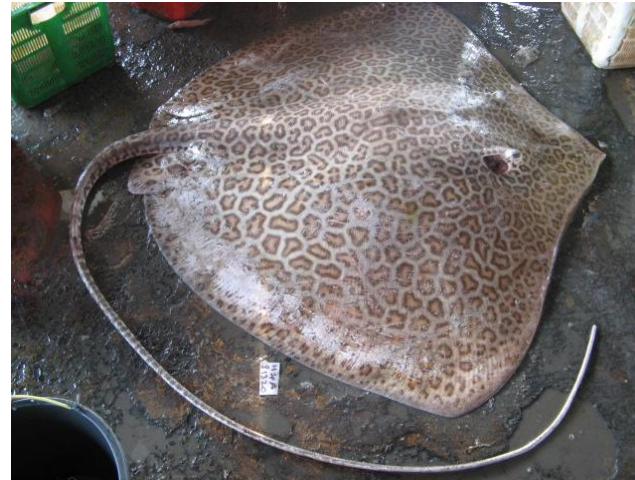

IR 077 (female, 1320 mm DW, cluster 4)

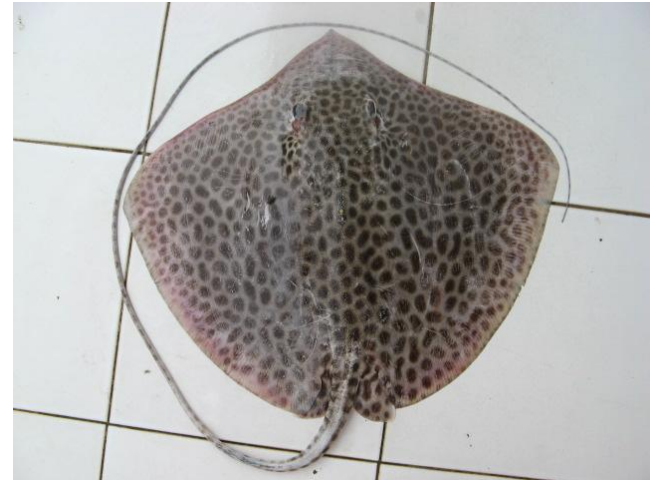

IR 078 (male, 490 mm DW, cluster 4)

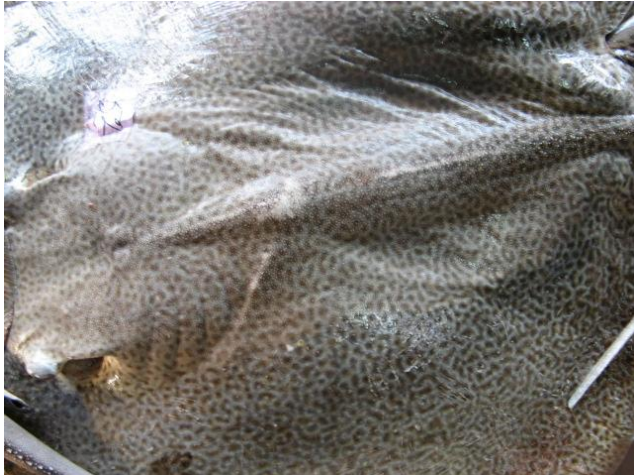

IR 079 (female, 1260 mm DW, cluster 1)

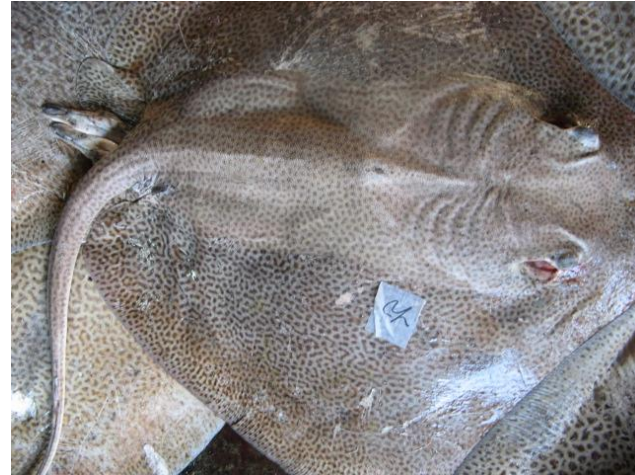

IR 080 (male, 1150 mm DW, cluster 1)

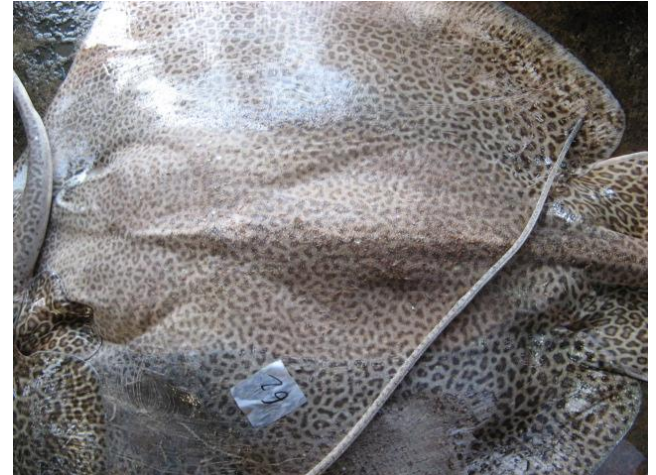

IR 081 (female, 1300 mm DW, cluster 1)

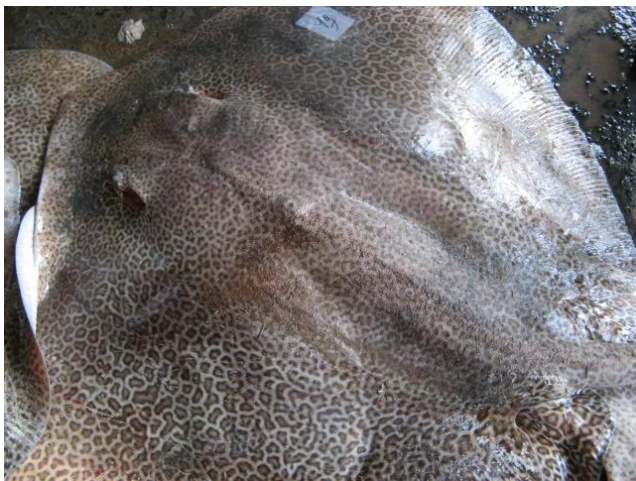

IR 082 (female, 1210 mm DW, cluster 1)

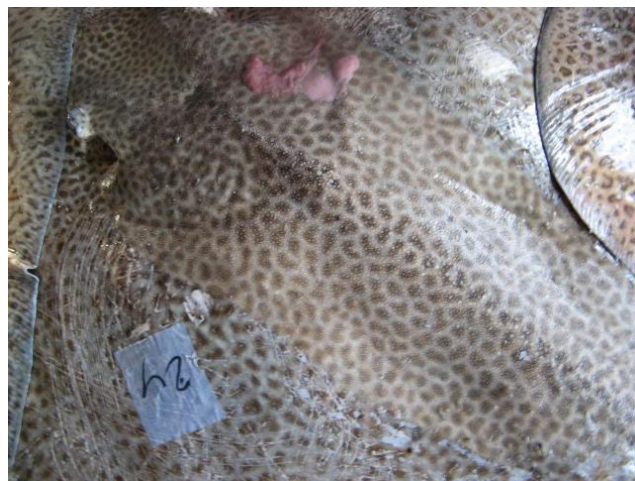

IR 083 (female, 1020 mm DW, cluster 1)

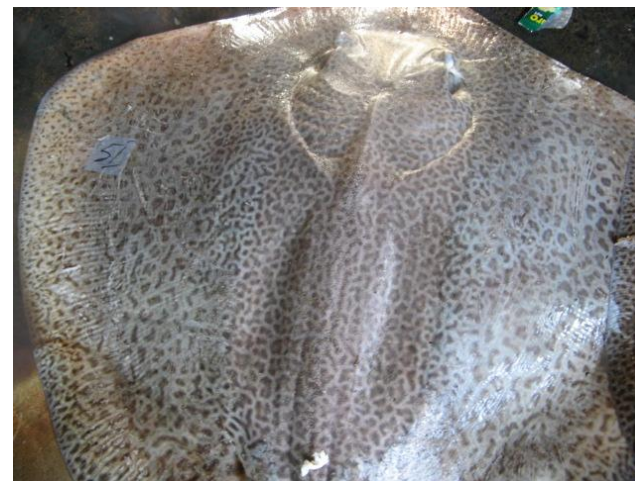

IR 084 (female, 1200 mm DW, cluster 1)

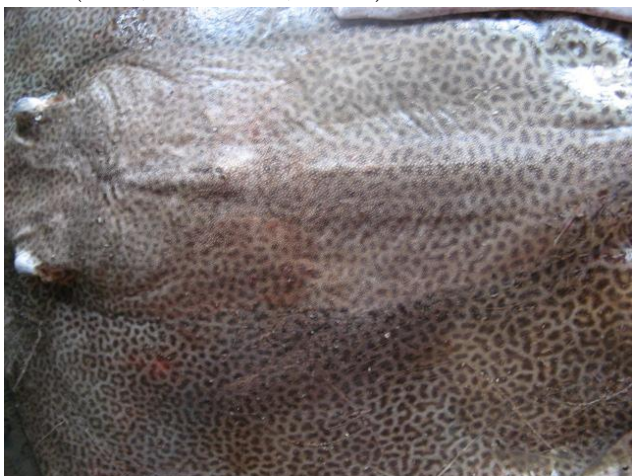

IR 085 (male, 1150 mm DW, cluster 1)

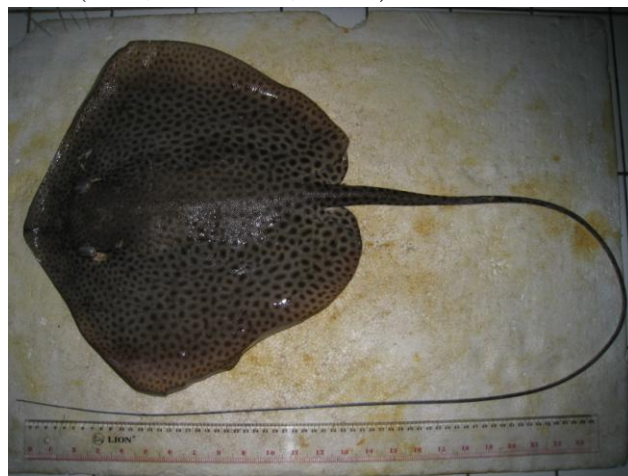

IR102=LIPi 4419 (male, 360 mm DW, cluster 3)

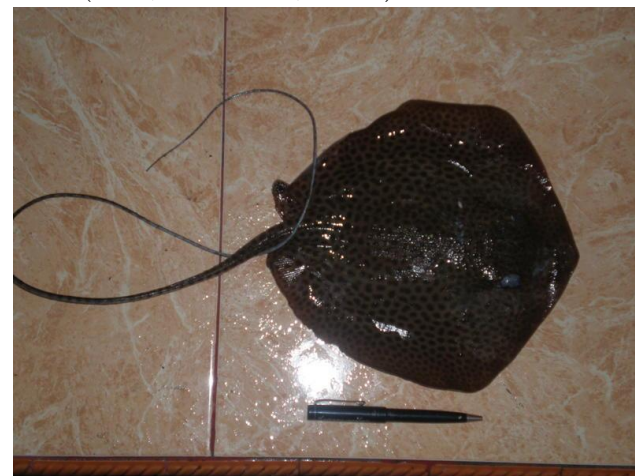

IR 112 (280 mm DW, cluster 1)

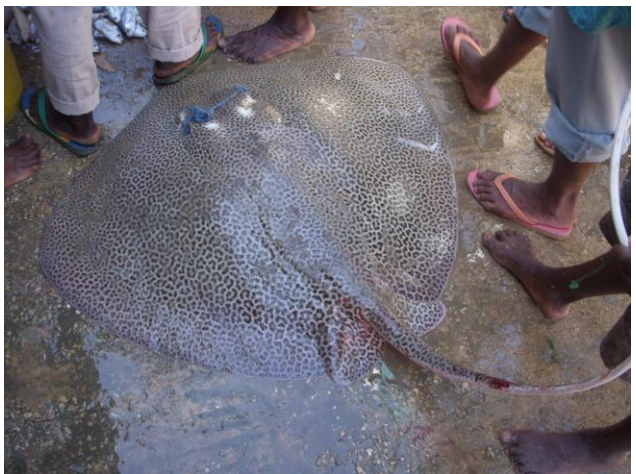

Zanz 6 (female, ~1150 mm DW, cluster 1)

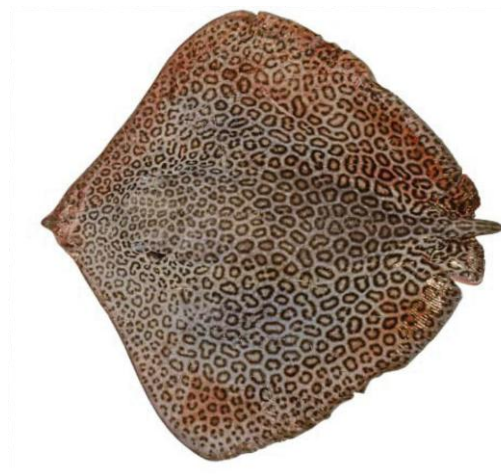

CSIRO H2903.01 (female, 1105 mm DW)

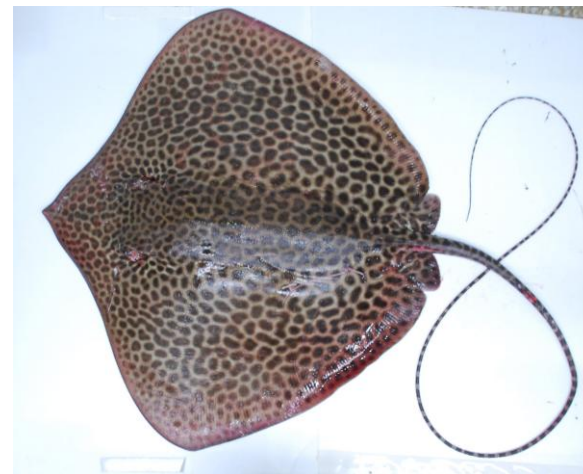

wjc637= NMMBP 015601 (cluster 3)

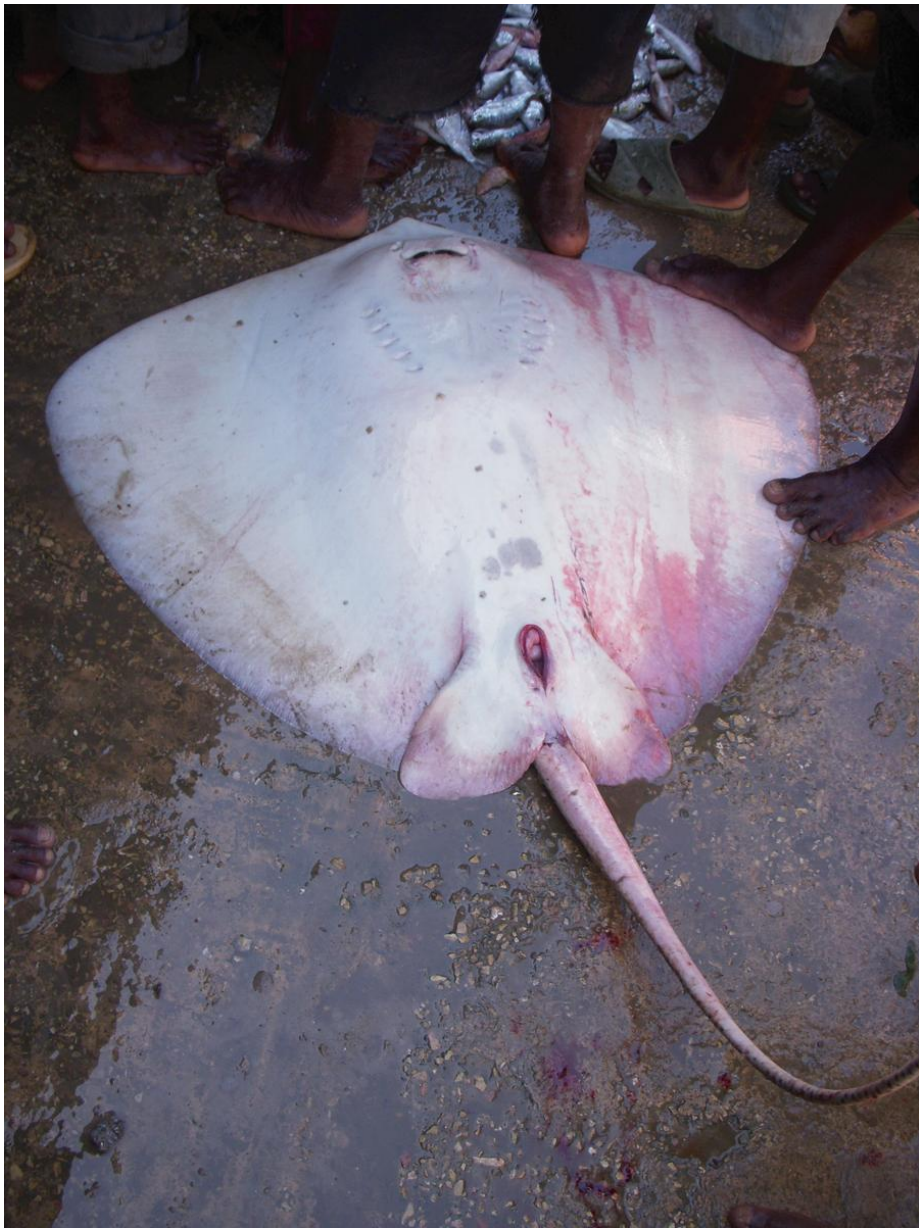

Zanz 6, ventral side

**Fig. S1. (continued)**
